# Supplementary figures and images for: CSMD1 Shows Complex Patterns of Somatic Copy Number Alterations and Expressions of mRNAs and Target Micro RNAs in Esophageal Squamous Cell Carcinoma
Source: MDPI journal article supplement (doi:10.3390/cancers14205001), 2022-10-13

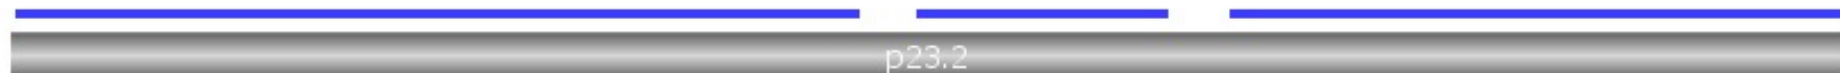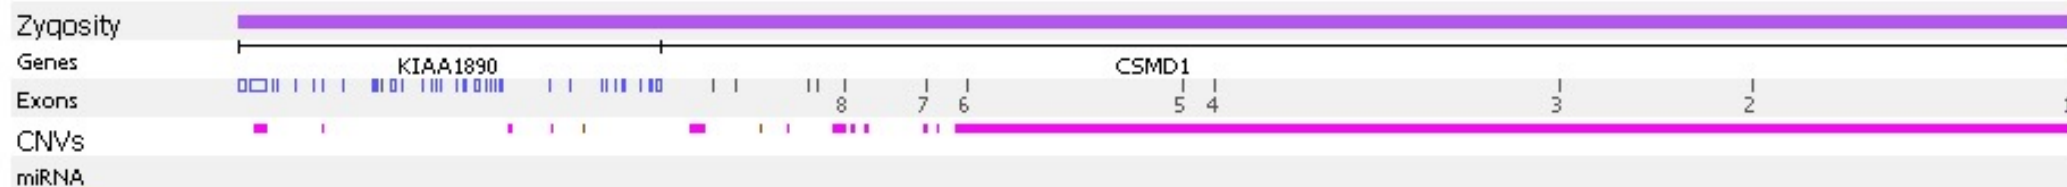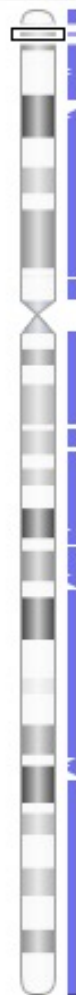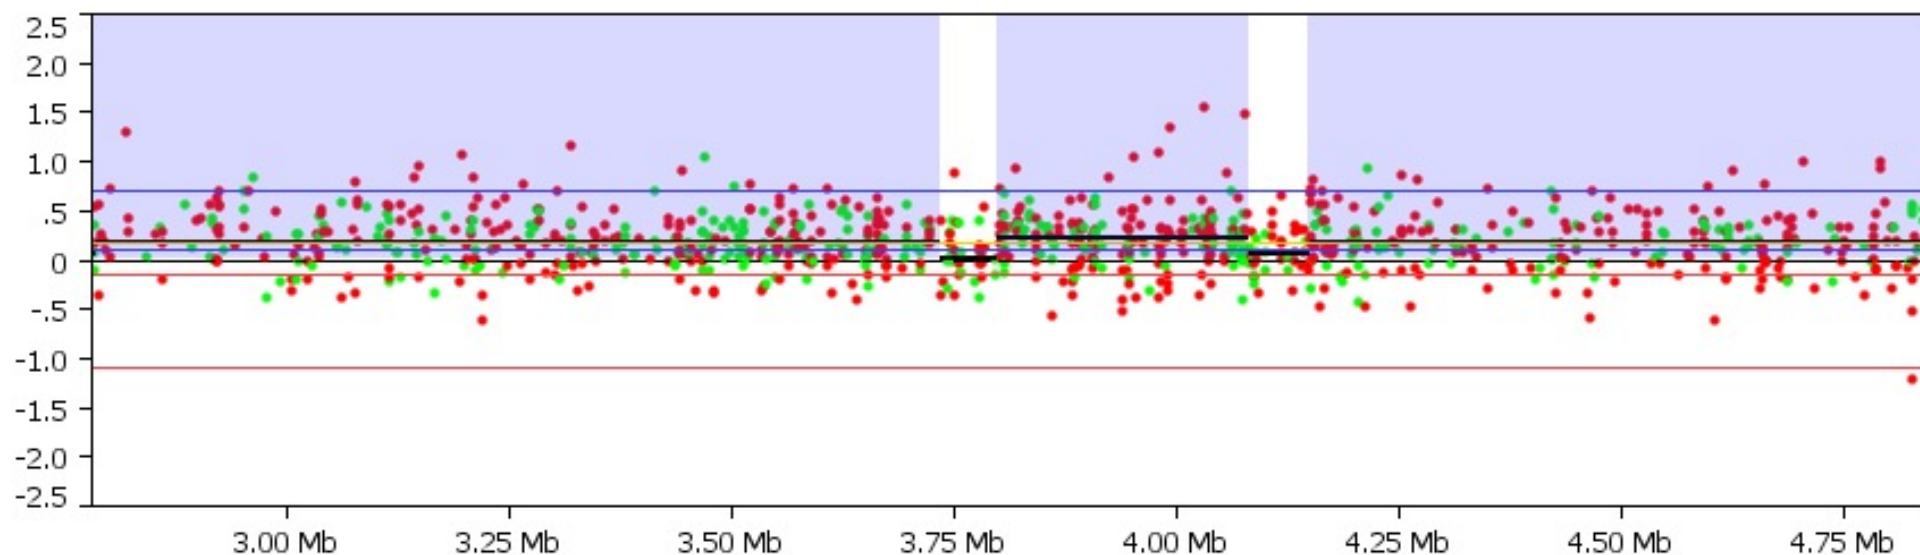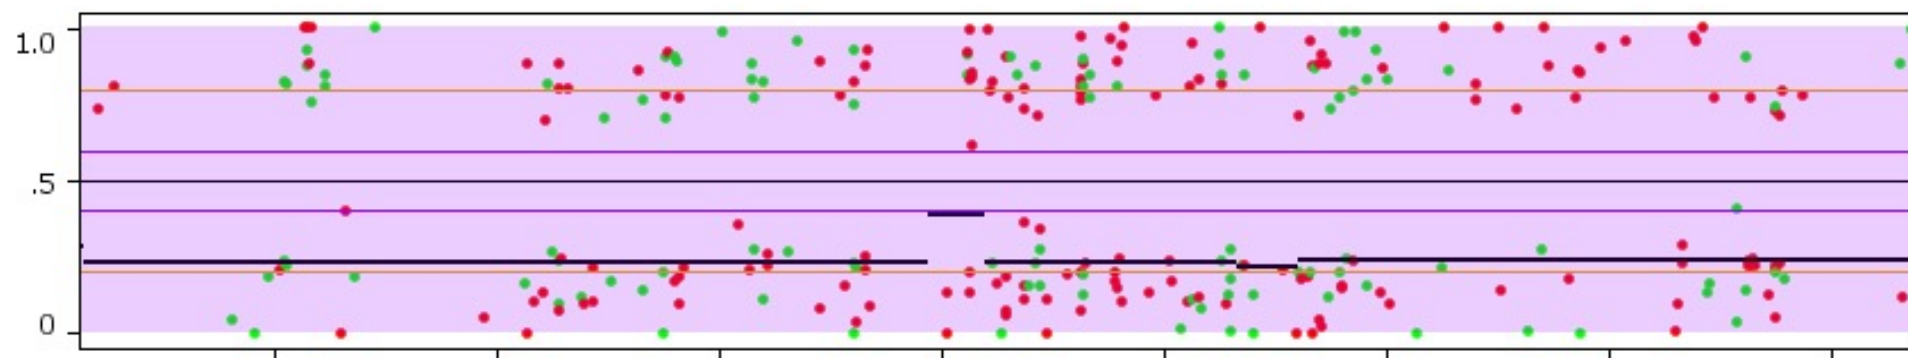

E1635: Chromosome 8

Supplement: s1 [file s1]

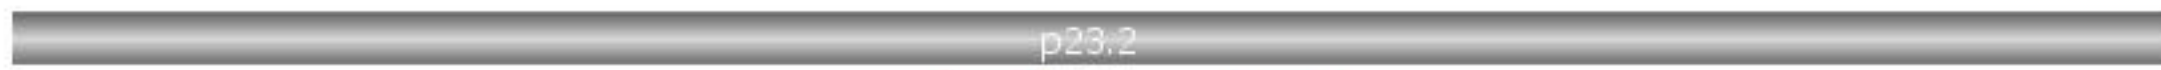

Zygosity

Genes

Exons

CNVs

miRNA

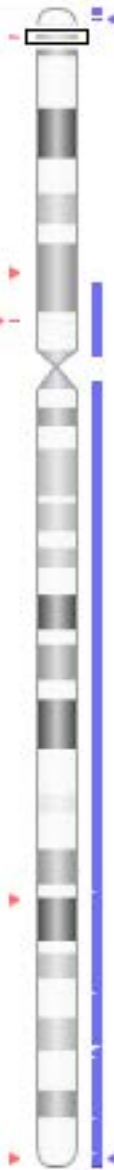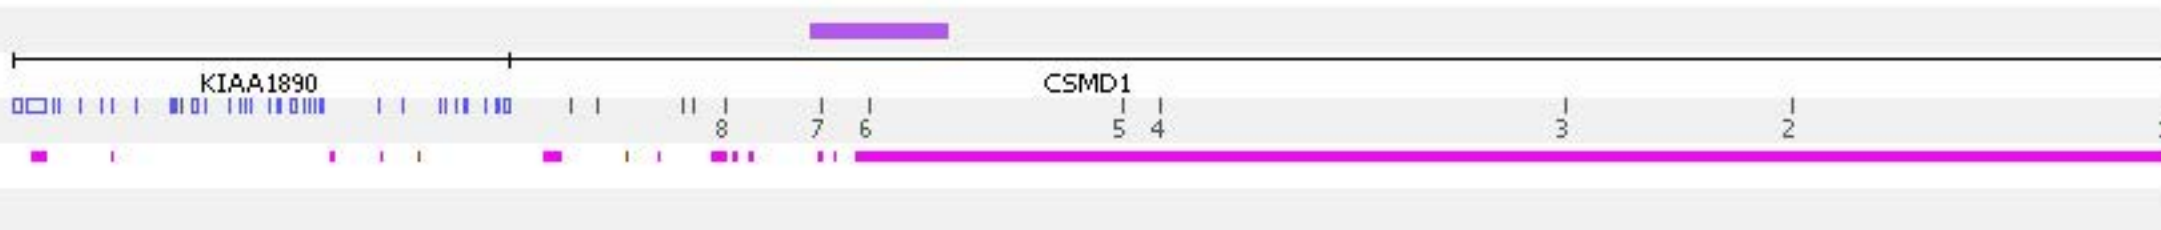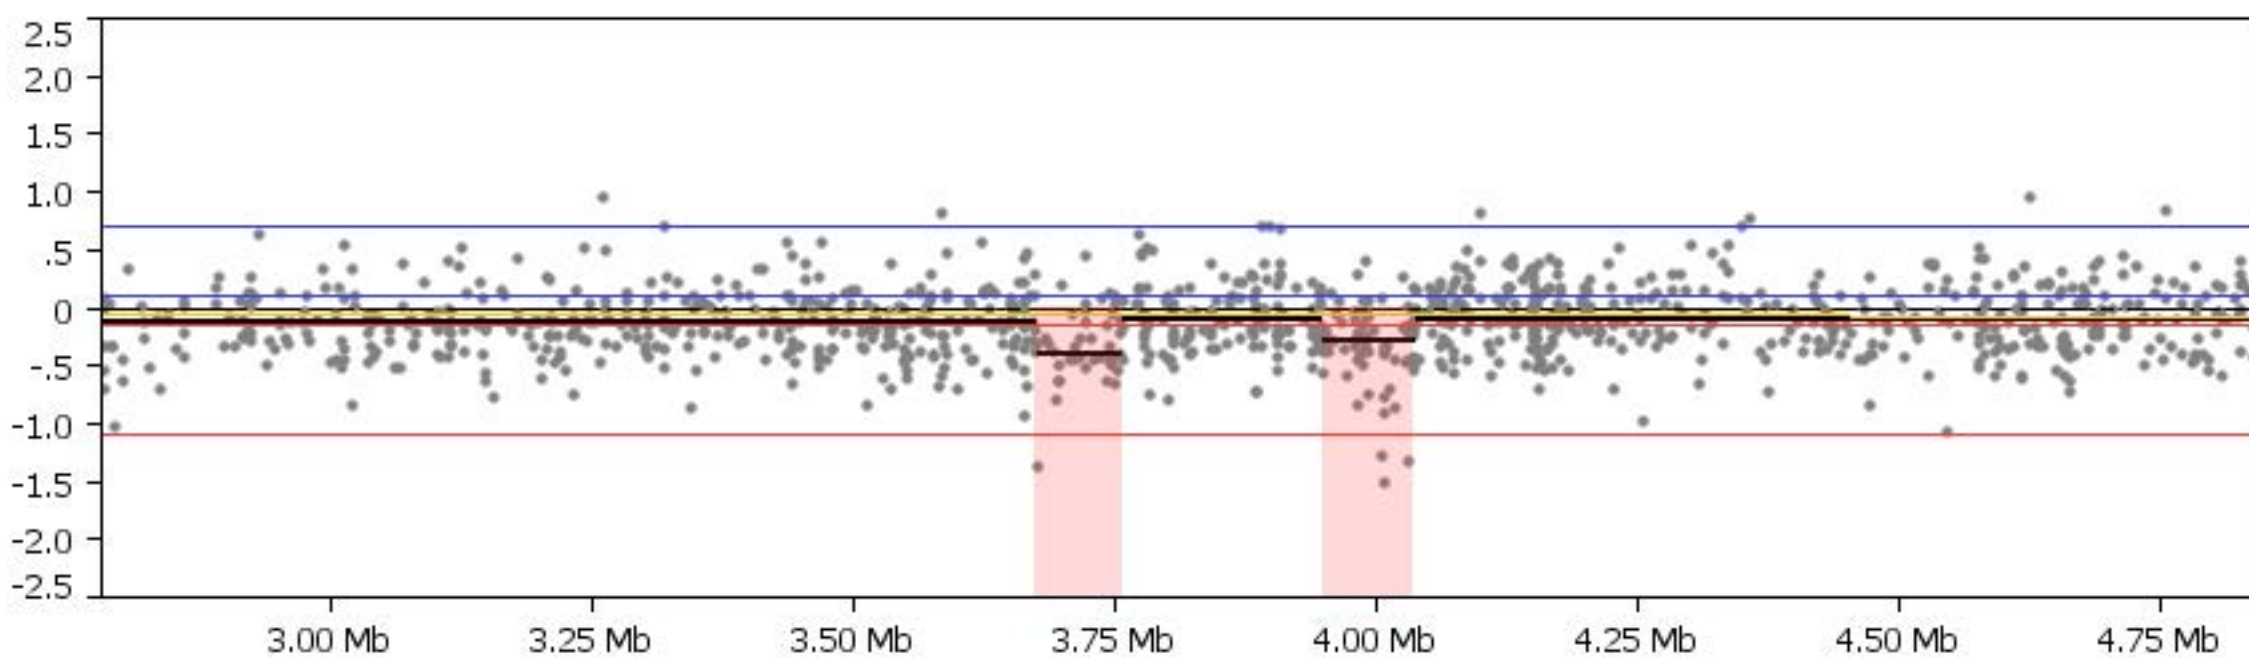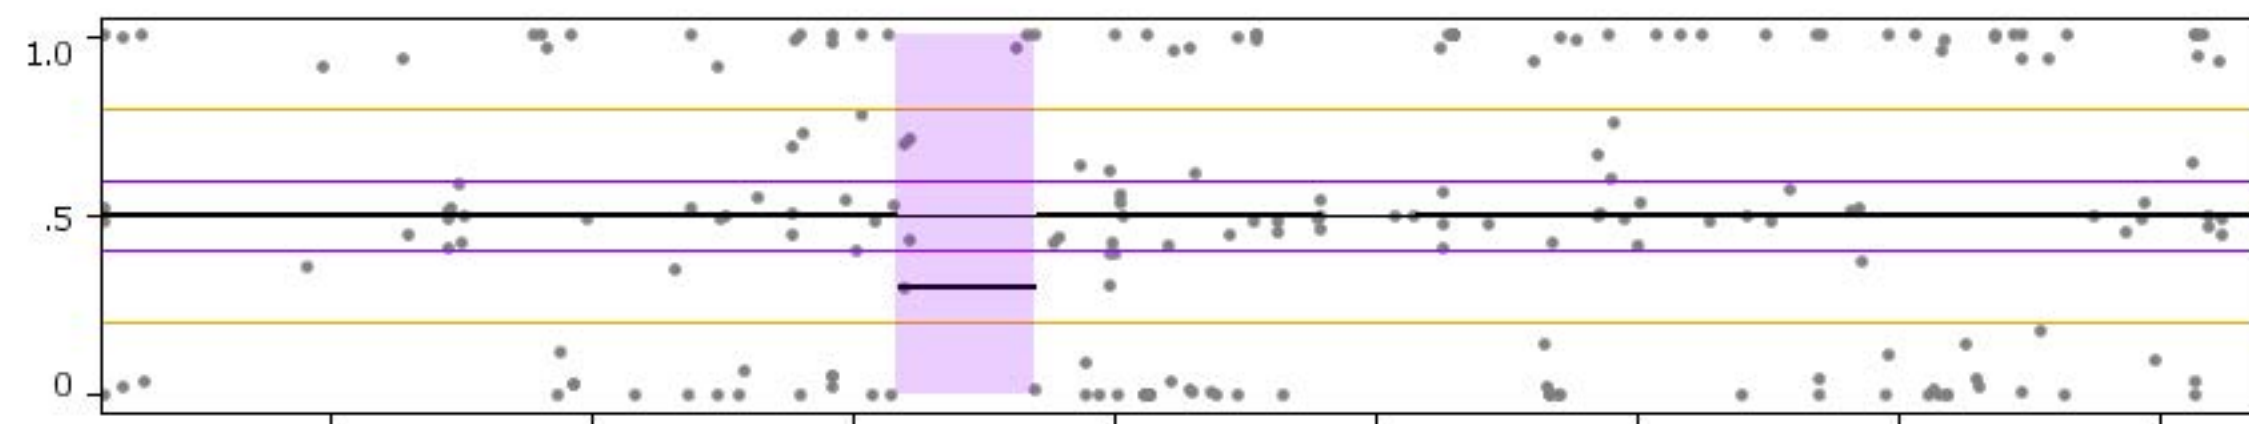

GE003: Chromosome 8

Supplement: s1 [file s1]

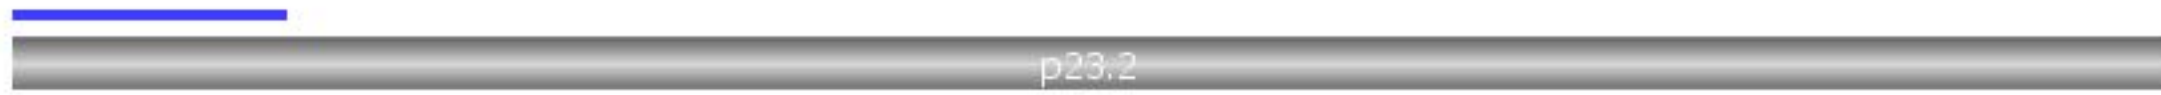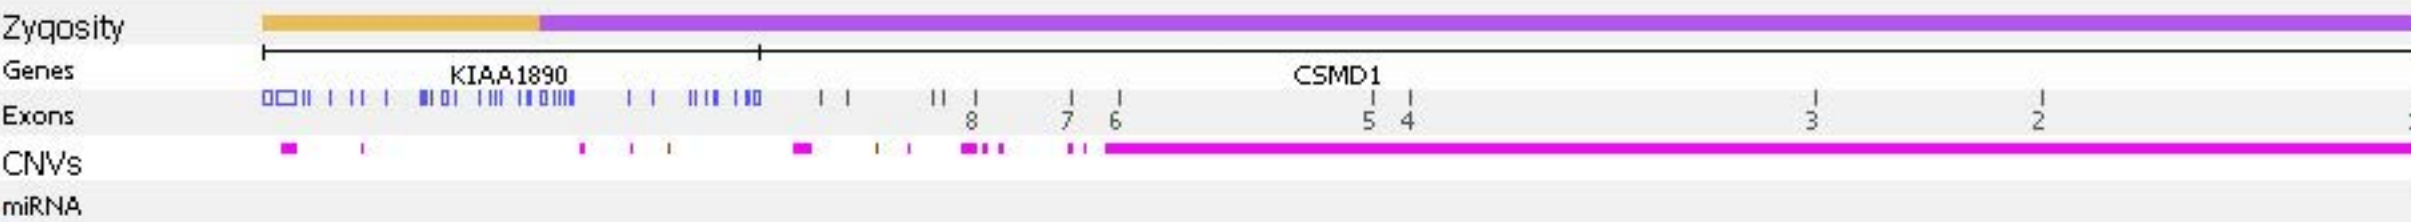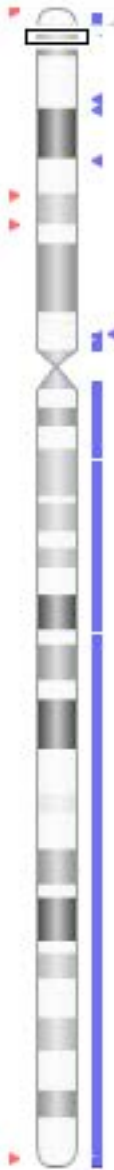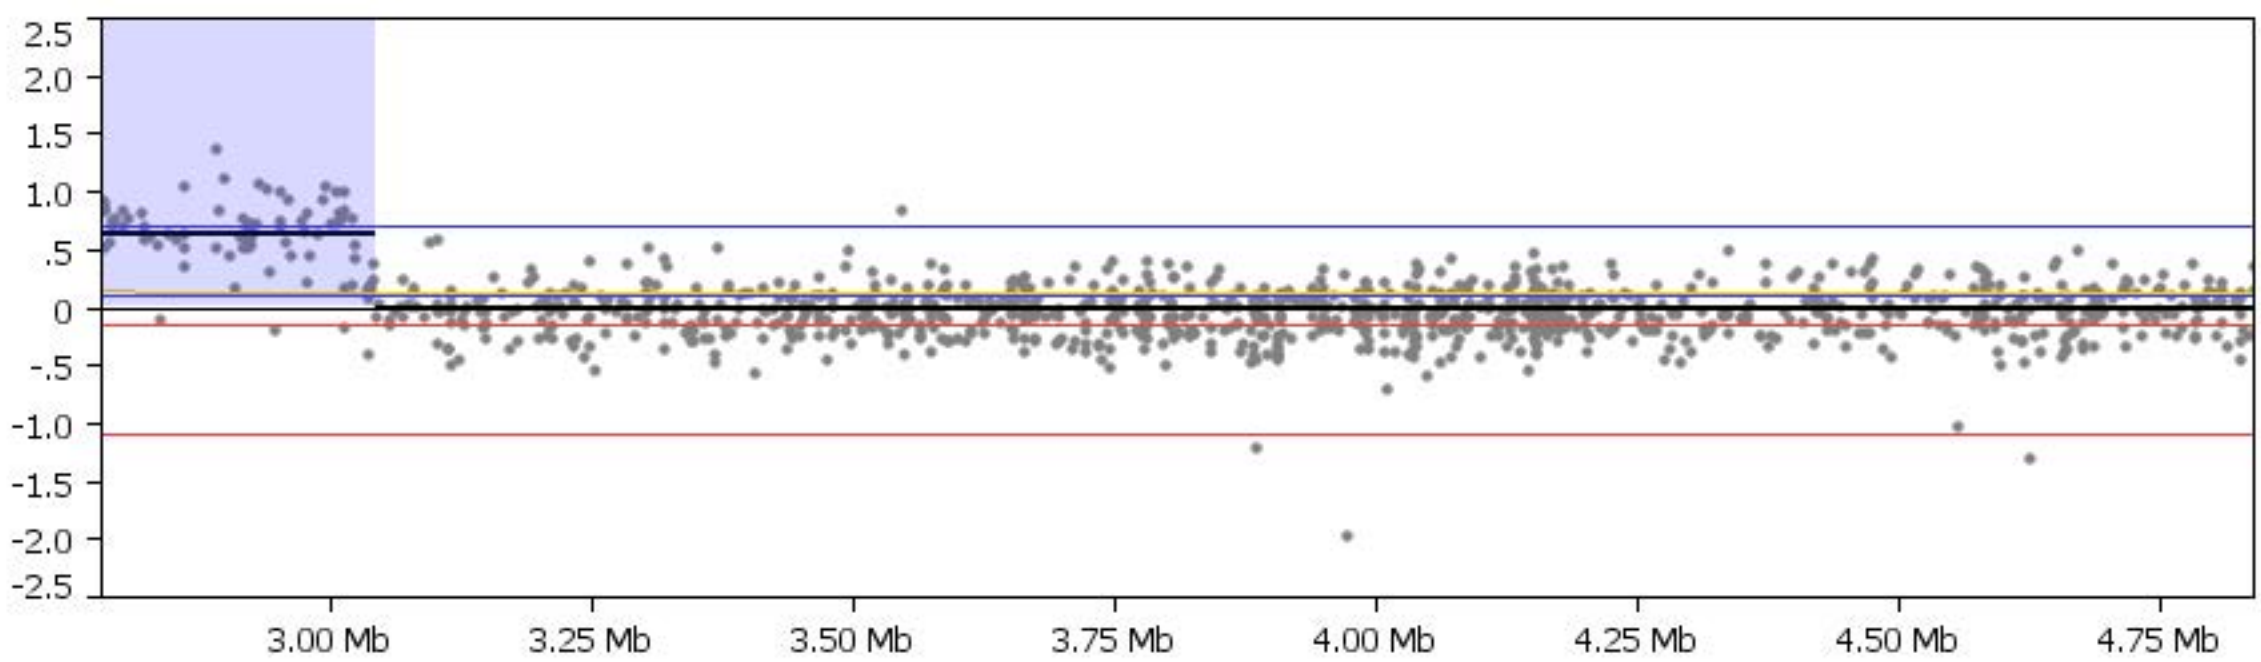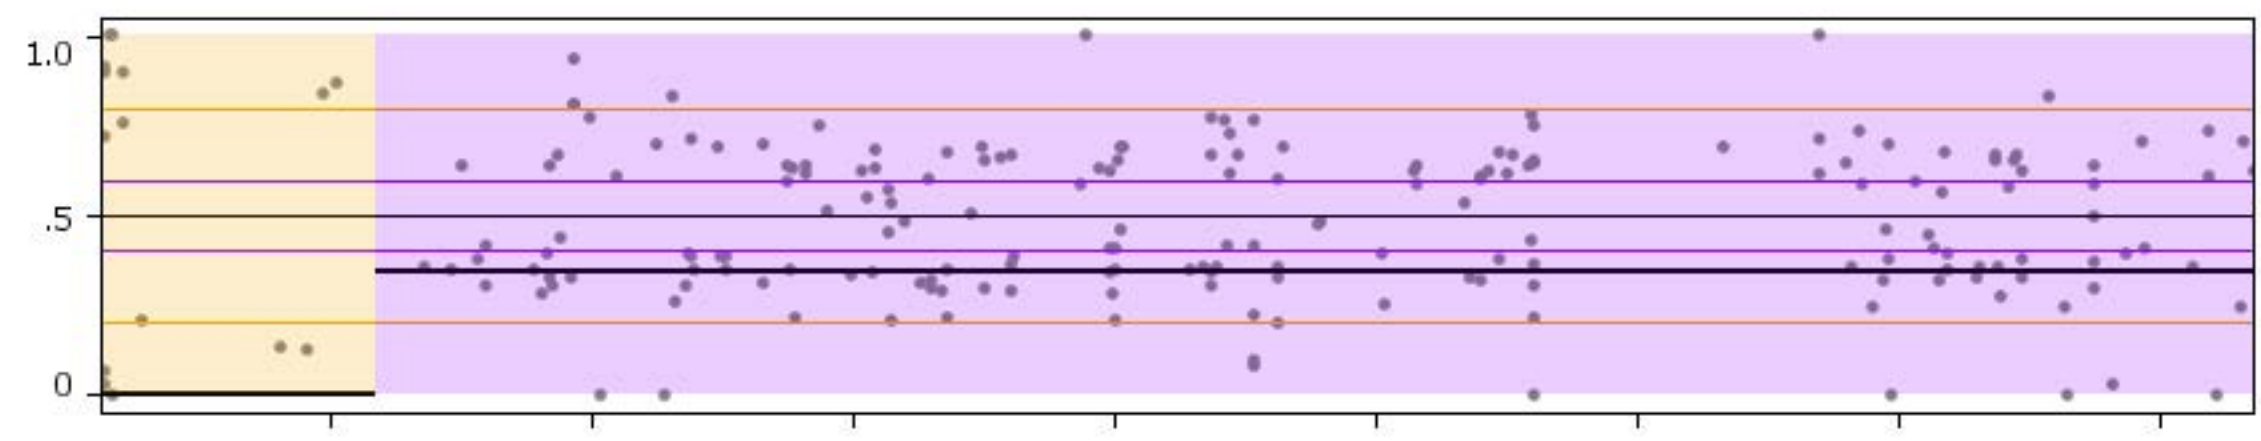

GE059: Chromosome 8

Supplement: s1 [file s1]

p23.2

Zygosity

Genes

KIAA1890

CSMD1

Exons

CNVs

miRNA

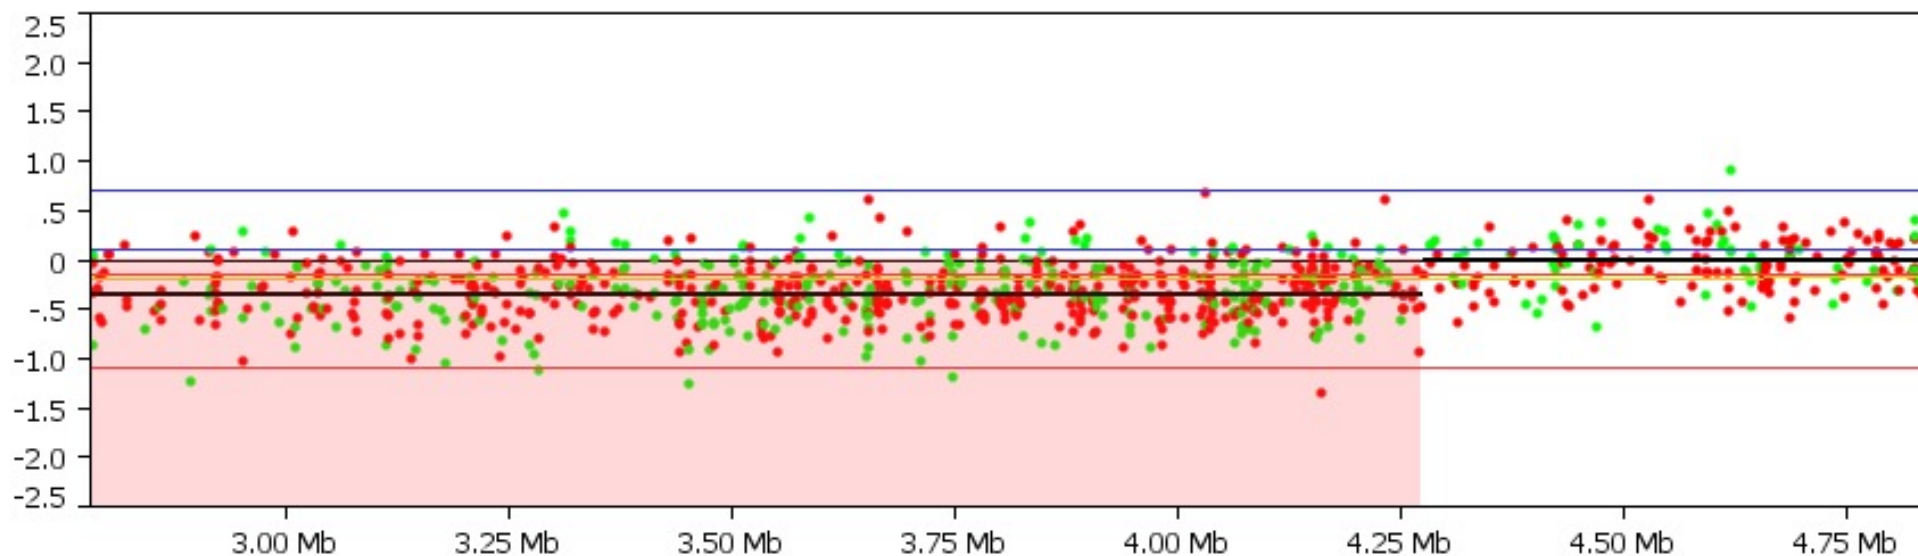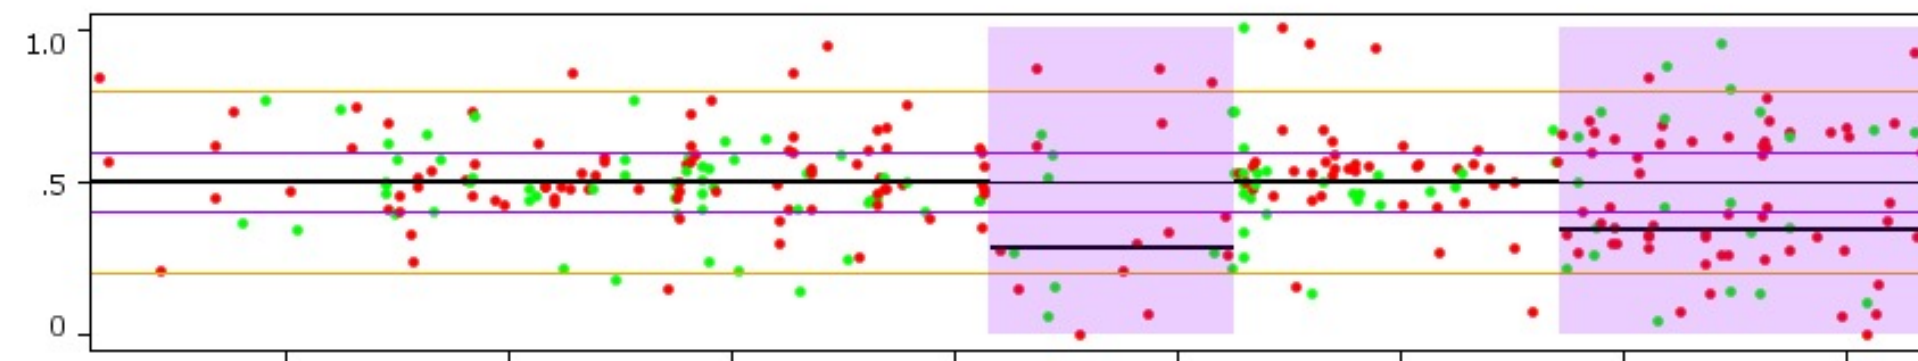

E1782: Chromosome 8

Supplement: s1 [file s1]

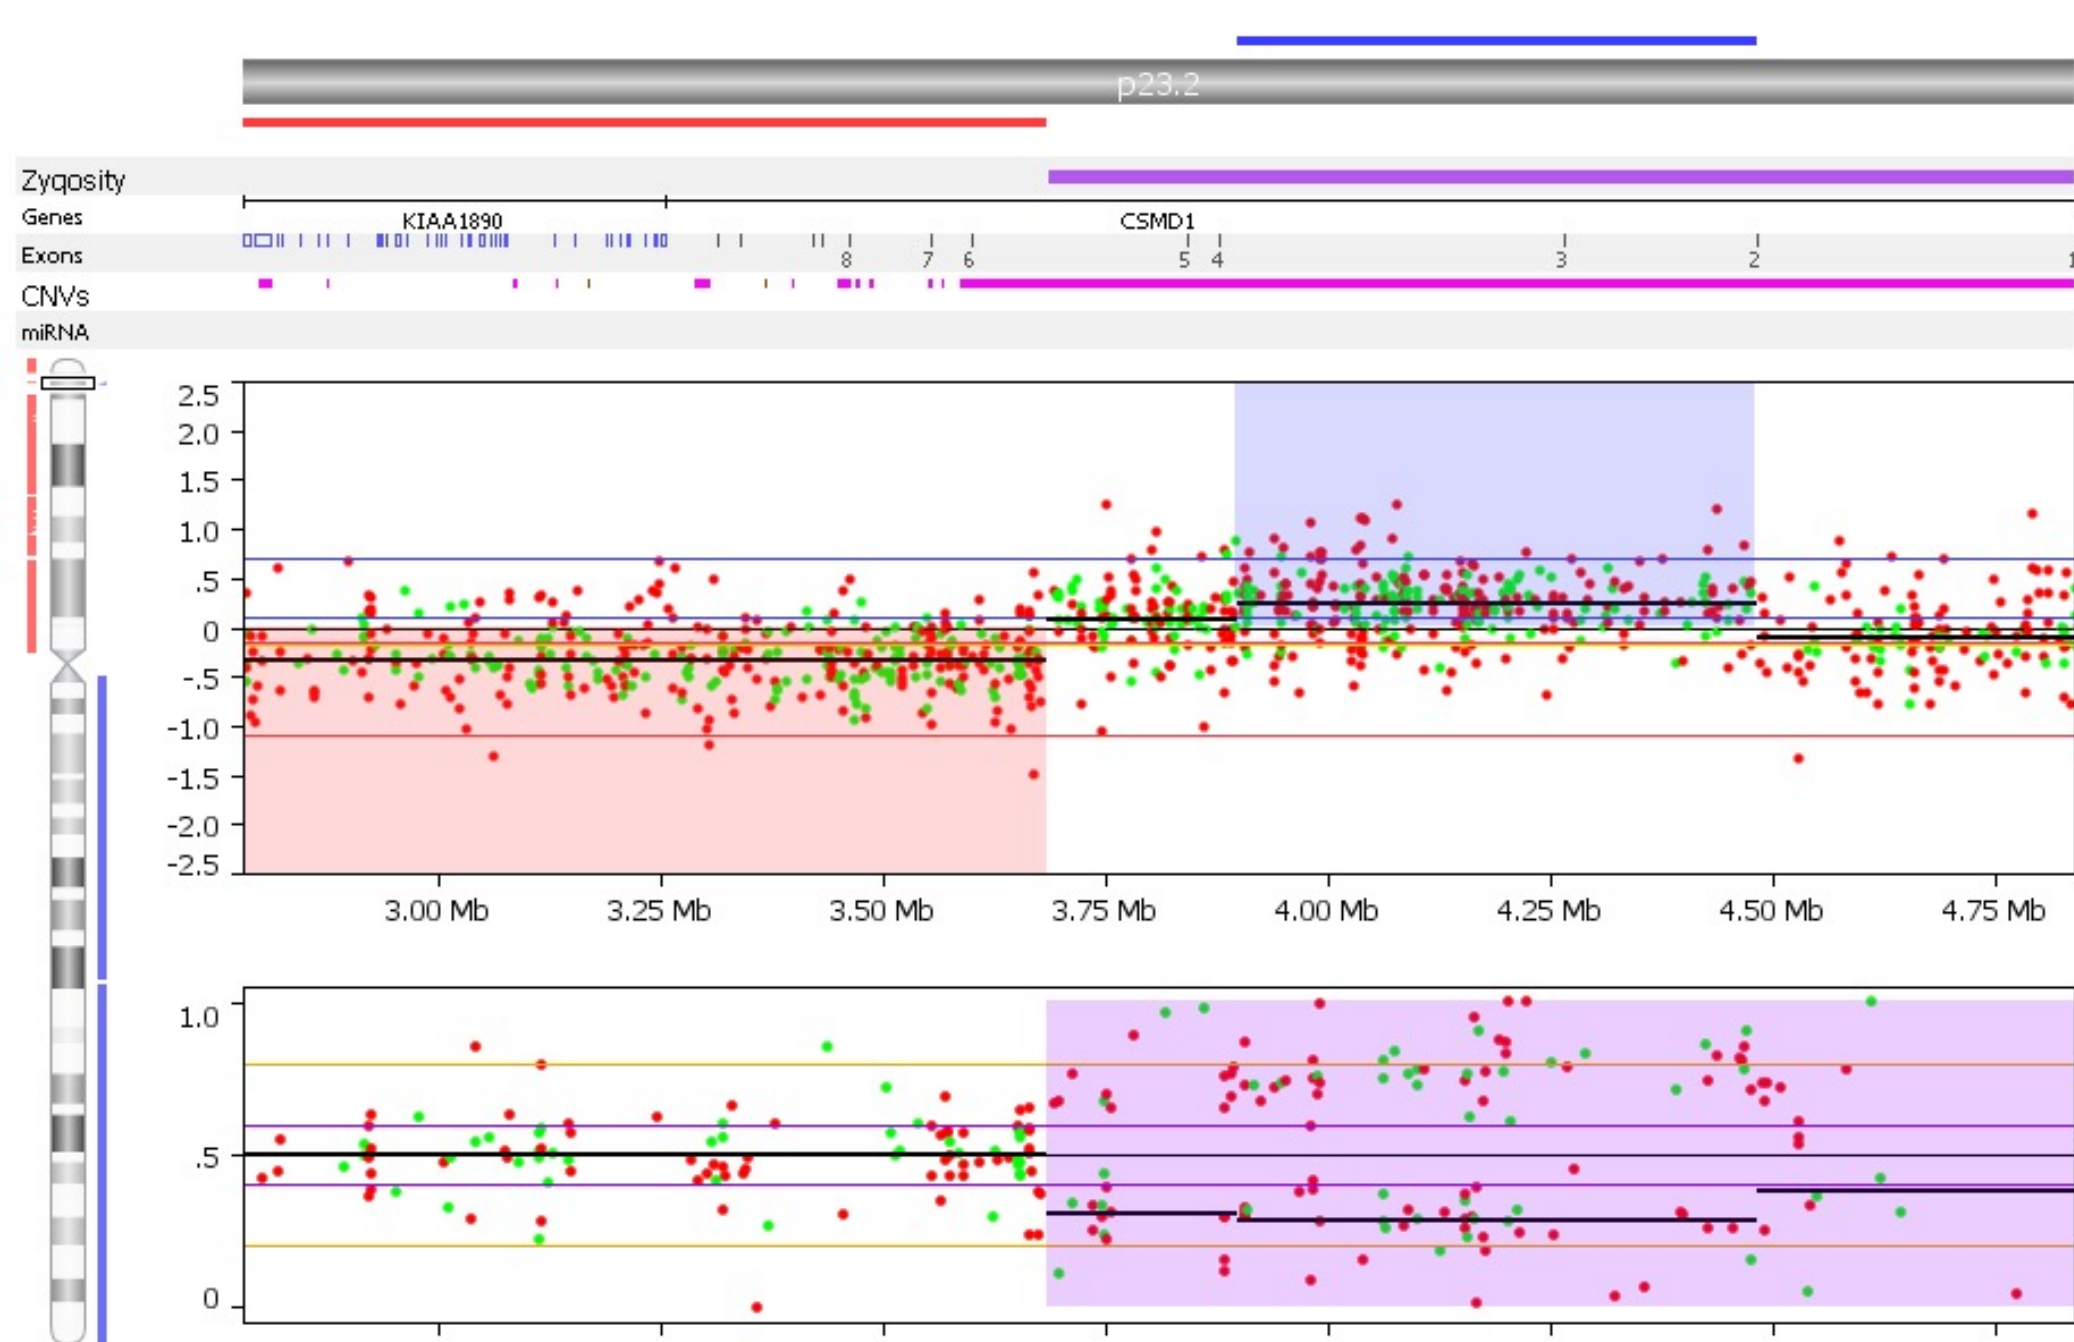

E1575: Chromosome 8

Supplement: s1 [file s1]
